# Supplementary material
Source: PubMed Central journal article supplement (PMC3655155)

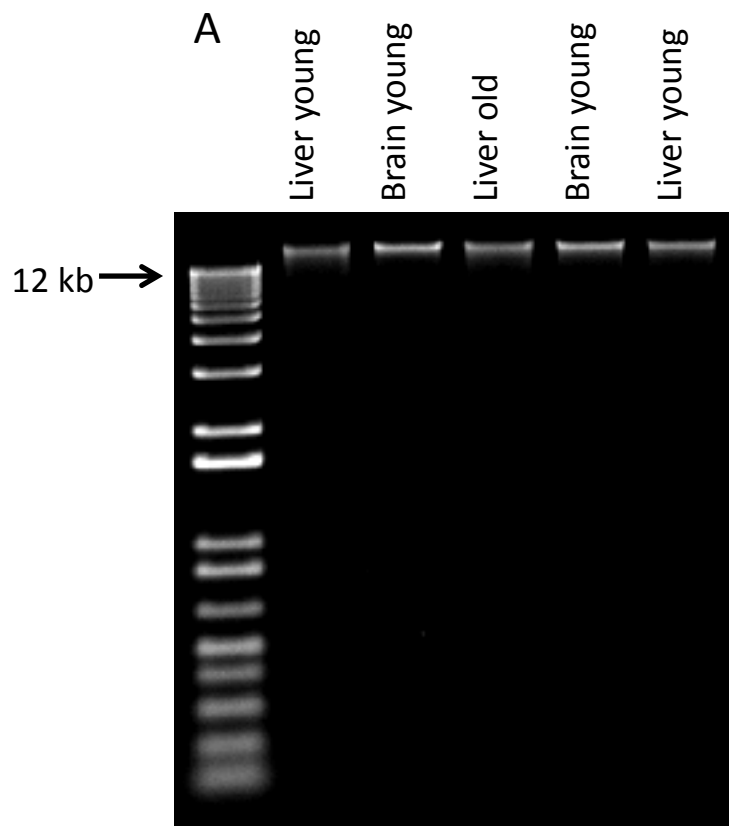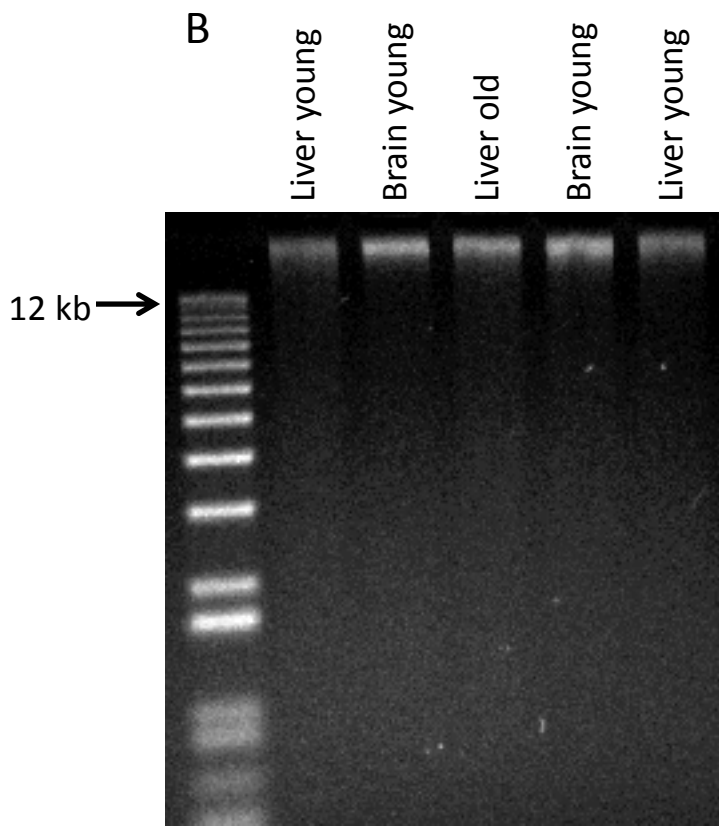

Supplement: NIHMS455818-supplement-Supp_Fig_S1.pdf [file NIHMS455818-supplement-Supp_Fig_S1.pdf]
